# Supplementary material for: The journey of strengthening mortality surveillance in Uganda through multisectoral guideline development
Source: Research Square preprint supplement (doi:10.21203/rs.3.rs-7358829/v1), 2025-11-10
Supplement: Supplementary file 1 [file 35445745eb3914b8c0fb50d4.xlsx]

## Sheet: Sheet1
Data elements in the monthly in-patient report (HMIS108)	Jan	Feb	Mar	April	May
108-CA01b. Cancer Kidney (Deaths)	0	1	1	0	0
108-CA02b. Cancer Breast (Deaths)	6	4	2	1	6
108-CA03b. Cancer prostate (Deaths)	7	6	11	6	3
108-CA04b. Cancer lung (Deaths)	11	3	5	7	6
108-CA05b. Cancer liver (Deaths)	4	1	2	6	6
108-CA06b. Cancer Colon (Deaths)	0	1	0	5	3
108-CA07b. Kaposis Sacoma (Deaths)	1	0	0	2	5
108-CA08b. Hepatocellular carcinoma (Deaths)	6	5	10	11	8
108-CA09b. Malignant neoplasm of Haemopoietin tissue e. g. leukaemia (Deaths)	5	1	4	3	9
108-CA10b. Others Cancers (Deaths)	19	28	24	21	11
108-CD01b. Diarrhea - Acute (Deaths)	32	33	32	39	29
108-CD02b. Diarrhea - Persistent (Deaths)	2	3	4	0	1
108-CD03b. Genital Ulcers (Deaths)	2	5	0	6	3
108-CD04b. Septicemia (Deaths)	82	79	84	82	76
108-CD05b. Peritonitis (Deaths)	9	4	6	9	10
108-CD06b. Pneumonia (Deaths)	372	255	295	356	289
108-CD07b. No Pneumonia - Cough and cold (Deaths)	11	60	12	9	10
108-CD09b. TB (Deaths)	65	57	57	64	74
108-CD10b. Leprosy (Deaths)	0	0	0	1	0
108-CD11b. Osteomyelitis (Deaths)	0	0	2	0	1
108-CD12b. Urinary Tract Infections (UTI) (Deaths)	19	116	82	55	46
108-CD13b. Tetanus (over 28 days age) (Deaths)	5	7	4	3	3
108-CD14b. Sleeping sickness (Deaths)	1	0	9	0	0
108-CR01b. Asthma (Deaths)	10	17	11	6	9
108-CR02b. Chronic Obstructive Pulmonary Diseases (COPD) (Deaths)	17	15	15	13	21
108-CR03b. Pulmonary Fibrosis (Deaths)	0	0	0	4	1
108-CR04b. Post TB Lung disease (Deaths)	9	3	10	10	9
108-CV01b. Hypertension (newly diagnosed cases) (Deaths)	54	57	47	38	52
108-CV02b. Hypertension (old cases) (Deaths)	97	133	113	93	106
108-CV03b. Stroke/Cardiovascular Accident(CVA) (Deaths)	110	73	95	64	64
108-CV04b. Heart failure (Deaths)	89	50	59	43	51
108-CV05b. Ischemic Heart Diseases (Deaths)	8	11	13	12	13
108-CV06b. Rheumatic Heart Diseases (Deaths)	8	3	3	6	4
108-CV07b. Chronic Heart Diseases (Deaths)	18	12	16	12	20
108-CV08b. Other Cardiovascular Diseases (Deaths)	36	58	44	35	51
108-EC01b. Ophthalmic Neonatorum (Deaths)	0	0	0	1	0
108-EC02b. Cataracts (Deaths)	0	0	0	1	0
108-EC04b. Glaucoma (Deaths)	0	1	0	0	0
108-EC05b. Trachoma (Deaths)	0	0	0	0	1
108-EC09b. Other eye conditions (Deaths)	0	7	0	0	0
108-EM01a.2. Diabetes mellitus (newly diagnosed cases) (Deaths)	57	41	31	40	37
108-EM01b.2. Diabetes mellitus (re-attendances) (Deaths)	71	63	68	65	80
108-EM02b. Thyroid disease (Deaths)	0	2	0	4	0
108-EM03b. Other Endocrine and metabolic disorders (Deaths)	9	5	6	4	6
108-EN01b. Otitis media (Deaths)	2	0	1	4	1
108-EN02b. Hearing loss (Deaths)	0	0	1	0	0
108-EN03b. Other ENT conditions (Deaths)	2	1	58	2	2
108-EP01a.2. Malaria Total (Deaths)	284	211	201	255	267
108-EP01b.2. Malaria Confirmed (Microscopic &RDT) (Deaths)	202	169	162	207	202
108-EP02b. Acute Flaccid Paralysis (Deaths)	1	0	0	0	0
108-EP03b. Animal Bites (suspected rabies) (Deaths)	3	8	0	17	4
108-EP04b. Cholera (Deaths)	0	2	0	1	0
108-EP05b. Dysentery (Deaths)	11	1	9	7	2
108-EP07b. Measles (Deaths)	32	10	8	13	7
108-EP08b. Neonatal tetanus (Deaths)	0	3	4	1	2
108-GC01b. Cancer of the cervix(newly diagnosed cases) (Deaths)	1	0	2	1	1
108-GC02b. Cancer of the cervix (re-attendance) (Deaths)	1	2	4	8	5
108-GC03b. Cancer of the breast (Deaths)	0	1	1	0	3
108-GC04b. Tubal Ovarian mass/cancer (Deaths)	1	1	2	2	0
108-GC05b. Pelvic Inflammatory Disease (PID) (Deaths)	21	21	9	25	16
108-GC06b. Uterine Fibroids (Deaths)	145	3	0	1	0
108-GC07b. Other Gynaecological conditions (Deaths)	10	5	39	5	346
108-GD01b. Abdominal Pain (Deaths)	3	9	4	5	15
108-GD02b. Intususception (Deaths)	6	21	3	7	8
108-GD03b. Peptic Ulcer Disease (Deaths)	40	64	53	45	78
108-GD04b. Gastro-esophageal reflux disease (GERD) (Deaths)	6	13	4	8	4
108-GD05b. Chronic Liver Disease (Deaths)	29	34	34	29	36
108-GD06b. Acute Hepatitis (Deaths)	8	9	7	8	12
108-GD07b. Irritable Bowel Syndrome (Deaths)	1	0	2	2	0
108-GD08b. Liver Cirrhosis (Deaths)	40	34	32	45	47
108-GD09b. Varices (oesophageal or gastric) (Deaths)	13	3	1	1	2
108-GD10b. Colorectal and anal disorder (Deaths)	0	1	1	0	1
108-GD11b. Multiple Myeloma (Deaths)	1	2	1	2	1
108-GD12b. Aplastic Anaemia (Deaths)	6	3	3	3	3
108-GD13b. Others(Specify) (Deaths)	7	19	10	31	10
108-HF01b. Ebola (Deaths)	1	0	0	0	0
108-HF05b. Severe Acute Respiratory Infection (SARI) (Deaths)	4	3	1	2	1
108-HF06b1. Adverse Events Following Immunization (AEFI)- Serious (Deaths)	0	0	0	0	1
108-HF07b. Typhoid Fever (Deaths)	17	9	7	11	58
108-HF08b. Presumptive MDR TB Cases (Deaths)	1	4	2	0	6
108-HF09b. Other Emerging infectious Diseases, specify (Deaths)	19	9	11	15	8
108-HP01b. Liver cirrhosis related to HBV (Deaths)	14	17	11	6	3
108-HP02b. Liver failure related to HCV (Deaths)	5	2	3	2	0
108-HP03b. Hepatocellular Carcinoma related to HBV (Deaths)	2	1	0	2	3
108-HP04b. Hepatocellular Carcinoma related to HCV (Deaths)	0	1	1	1	0
108-HP05b. Acute Hepatitis (Deaths)	18	14	13	9	9
108-IN01a.2. Motor Vehicle (Deaths)	49	56	55	68	31
108-IN01b.2. Motor Cycle (Deaths)	68	60	56	51	25
108-IN01c.2. Bicycles (Deaths)	1	1	0	0	1
108-IN01d.2. Others (Deaths)	27	22	54	25	18
108-IN02b. Jaw injuries (Deaths)	2	2	1	0	1
108-IN03b. Injuries - (Trauma due to other causes) (Deaths)	56	31	86	33	41
108-IN04a.2. Animal bites - Domestic (Deaths)	3	1	8	2	2
108-IN04b.2. Animal bites - Wild (Deaths)	1	0	1	0	1
108-IN04c.2. Animal bites - Insects (Deaths)	2	4	5	2	2
108-IN05b. Snakes bites (Deaths)	2	4	7	22	10
108-LD01b. Hernias (Deaths)	4	9	0	7	1
108-LD02b. Diseases of the appendix (Deaths)	1	1	3	12	0
108-LD03b. Diseases of the skin (Deaths)	4	1	4	11	3
108-LD04b. Muscular skeletal and connective tissue diseases (Deaths)	4	5	6	4	4
108-LD05b. Genital urinary system diseases (non- infective) (Deaths)	5	3	4	9	1
108-LD06b. Congenital malformations and chromosome abnormalities (Deaths)	6	5	6	8	4
108-LD07b. Complications of medical and surgical care (Deaths)	17	8	2	8	8
108-LD08b. Benign neoplasm-s (all types) (Deaths)	2	2	0	4	2
108-LD09b. Coetaneous ulcersv (Deaths)	2	1	0	0	2
108-MC01b. Abortions due to Gender Based Violence (GBV) (Deaths)	0	0	0	2	2
108-MC02b. Abortions due to other causes (Deaths)	27	16	25	46	15
108-MC03b. Malaria in pregnancy (Deaths)	12	23	11	8	16
108-MC04b. High blood pressure in pregnancy (Deaths)	8	10	4	3	8
108-MC05b. Obstructed labour (Deaths)	5	3	2	41	6
108-MC06b. Haemorrhage related to pregnancy (APH or PPH) (Deaths)	38	15	8	6	5
108-MC07b. Sepsis related to pregnancy (Deaths)	9	12	2	6	2
108-MC08b. Obstetric Fistula (Deaths)	4	1	0	0	0
108-MC10b. No. of fistulas closed and dry at discharge (Deaths)	4	0	0	0	0
108-MC12b. Other Complications of pregnancy (Deaths)	11	9	9	13	14
108-ME01b. Cerebro-vascular events (Deaths)	3	1	7	1	15
108-ME02b. Cardiac arrest (Deaths)	33	48	36	28	48
108-ME03b. Gastro-intestinal bleeding (Deaths)	17	16	30	8	21
108-ME04b. Respiratory distress (Deaths)	63	80	72	94	51
108-ME05b. Acute renal failure (Deaths)	13	17	19	5	13
108-ME06a.2. Acute sepsis Totals (Deaths)	45	35	51	41	59
108-ME06b.2. Acute sepsis Given Oxygen (Deaths)	29	22	23	17	14
108-ME07b. All others (Deaths)	578	605	541	420	467
108-MG01b. Bacterial Meningitis (Deaths)	13	11	33	18	20
108-MG02b. Viral Meningitis (Deaths)	1	1	1	1	1
108-MG03b. Cryptoccocal Meningitis (Deaths)	13	11	17	9	12
108-MG04b. Other types of meningitis (Deaths)	14	13	23	13	28
108-NC01b. Haematological Diseases (Deaths)	6	3	3	3	14
108-NC02b. Anaemia (Deaths)	194	117	139	136	138
108-NC03b. Sickle cell disease (Deaths)	38	22	30	36	43
108-NC04b. Deep Vein Thrombosis (Deaths)	3	3	1	2	0
108-NC05b. Lymphoma (Deaths)	0	1	0	7	1
108-NC06b. Multiple Myeloma (Deaths)	0	2	1	1	1
108-NC07b. Pain Requiring Palliative Care (Deaths)	3	7	783	0	5
108-NC08b. Liver cirrhisis related to alcohol (Deaths)	9	6	22	22	9
108-NC09b. Liver cirrhosis related to other causes (Deaths)	6	5	14	6	11
108-ND01b. Neonatal Sepsis 0-7days (Deaths)	106	124	94	62	78
108-ND02b. Neonatal Sepsis 8-28days (Deaths)	40	30	23	19	17
108-ND03b. Neonatal Pneumonia (Deaths)	8	13	16	13	14
108-ND04b. Neonatal Meningitis (Deaths)	7	4	4	1	7
108-ND05b. Neonatal Jaundice (Deaths)	19	26	19	18	13
108-ND06b. Premature baby (as condition that requires mgt) (Deaths)	185	158	142	160	136
108-ND07b. Other Neonatal Conditions (Deaths)	213	193	254	172	201
108-NR01b. Headache (Deaths)	6	10	3	2	7
108-NR02b. Epilepsy (Deaths)	9	9	6	3	8
108-NR03b. Cerebral Vascular disease (Deaths)	1	5	7	1	7
108-NR04b. Neuropathies (Deaths)	1	1	1	0	2
108-NR05b. Parkinson-s disease (Deaths)	1	0	0	3	1
108-NR06b. Other movement disorders (Deaths)	0	1	0	1	2
108-NR07b. Spinal Cord disorders (Deaths)	4	4	1	0	4
108-NT02b. Lymphatic Filariasis (hydrocele) (Deaths)	2	0	46	0	0
108-NT03b. Lymphatic Filariasis (Lympoedema) (Deaths)	0	0	14	1	0
108-NT04b. Urinary Schistosomiasis (Deaths)	0	1	0	0	1
108-OD01b. Dental Caries (Deaths)	3	3	0	0	2
108-OD02b. Gingivitis (Deaths)	67	0	10	0	0
108-OD03b. Jaw injuries (Deaths)	0	1	0	2	0
108-OD04b. Other oral diseases and conditions (Deaths)	2	1	2	2	1
108-OD05b. HIV-Oral lesions (Deaths)	14	6	4	5	9
108-OD06b. Oral Cancers (Deaths)	1	1	1	1	0
108-RD01b. Nephrotic syndrome (Deaths)	0	0	2	3	26
108-RD02b. End stage renal diseases (for those who need dialysis) (Deaths)	17	17	18	21	21
108-RD03b. Chronic Kidney Diseases (Deaths)	43	31	39	36	40
108-RD04b. Acute Kidney Injury (Deaths)	21	21	38	25	33
108-RD05b. HIV nephropathy (Deaths)	30	19	3	20	12
108-RM01b. Rheumatoid Arthritis (Deaths)	0	0	1	0	10
108-RM02b. Septic Arthritis (Deaths)	0	1	2	2	2
108-RM03b. Osteoarthritis (Deaths)	0	3	0	2	3
108-RM05b. Systemic Lupus Erythematous (Deaths)	0	0	1	1	1
108-RM08b. Myalgia (Deaths)	0	0	1	0	2
108-RM09b. Others (please specify) (Deaths)	1	0	2	0	3
108-TX01b. Organophosphate poisoning (Deaths)	17	28	20	17	16
108-TX02b. Drug overdose (Deaths)	4	1	2	4	8
108-TX03b. Rat Poisoning (Deaths)	3	3	3	6	2
108-TX04b. Snake poison (Deaths)	1	0	0	0	6
108-TX05b. Poison of unknown etiology (Deaths)	6	8	4	8	3
108a-CC07b. Others (Deaths)	4	0	7	3
108a-CD04b. Patent Dactus Arteriosus (PDA) (Deaths)	0	0	0	2
108a-CI03. No. of deaths (C)	21	17	20	30	27
108a-CM01b. Dilated Cardiomyopathy (Deaths)	4	0	4	4
108a-CM03b. Restrictive Cardiomyopathy (Deaths)	1	0	0	0
108a-EC01b. Endocarditis (Deaths)	1	0	0	0
108a-HC02b. Acute Myeloid leukemia (Deaths)	0	0	1	2	0
108a-HC04b. Acute lymphoid leukemia (Deaths)	2	0	2	9	3
108a-HC11b. Burkitt‚Äôs Lymphoma (Deaths)	1	0	1	1	0
108a-HD01b. Hypertension (Deaths)	0	0	0	1
108a-HD04b. Hypertensive Heart Disease (Deaths)	0	0	1	0
108a-IH05b. Coronary Embolism (Deaths)	1	0	0	0
108a-OC08b. Wilms tumour (Deaths)	1	0	0	0	0
108a-PD01b. Pulmonary Embolism (Deaths)	1	0	0	0
108a-PD05b. Chronic Obstructive Airway Disease (COPD) (Deaths)	0	0	0	1
108a-RH02b. Mitral Valve Disease (Deaths)	1	0	2	1
108a-VA02b. Thrombophlebitis (Deaths)	0	0	0	1
108a-VA06b. Aortic Aneurysm (Deaths)	1	0	0	1
108-CI03. No. of deaths	4503	3812	4357	5867	4280
Sum of individual IPD mortality elements	4535	4001	4908	3846	4212
