# Supplementary material for: The journey of strengthening mortality surveillance in Uganda through multisectoral guideline development
Source: Research Square preprint supplement (doi:10.21203/rs.3.rs-7358829/v1), 2025-11-10
Supplement: Supplementary file 2 [file 547c4680439ecce7b06e8f53.xlsx]

## Sheet: Sheet1
Data elements for Calculating Total number of deaths in the OPD monthly reports (105-DT01. Deaths in OPD)
105-DT01. Deaths in OPD	105-MA13. Maternal deaths
105-ES10. Total number of Deaths in Emergency Unit
105-MA11. Newborn deaths (0-7 days)
Data elements for Calculating Total number of deaths in the IPD monthly reports (108-CI03. No. of deaths)
108-CA01b. Cancer Kidney (Deaths)	108-OD05b. HIV-Oral lesions (Deaths)
108-CA02b. Cancer Breast (Deaths)	108-OD06b. Oral Cancers (Deaths)
108-CA03b. Cancer prostate (Deaths)	108-RD01b. Nephrotic syndrome (Deaths)
108-CA04b. Cancer lung (Deaths)	108-RD02b. End stage renal diseases (for those who need dialysis) (Deaths)
108-CA05b. Cancer liver (Deaths)	108-RD03b. Chronic Kidney Diseases (Deaths)
108-CA06b. Cancer Colon (Deaths)	108-RD04b. Acute Kidney Injury (Deaths)
108-CA07b. Kaposis Sacoma (Deaths)	108-RD05b. HIV nephropathy (Deaths)
108-CA08b. Hepatocellular carcinoma (Deaths)	108-RM01b. Rheumatoid Arthritis (Deaths)
108-CA09b. Malignant neoplasm of Haemopoietin tissue e. g. leukaemia (Deaths)	108-RM02b. Septic Arthritis (Deaths)
108-CA10b. Others Cancers (Deaths)	108-RM03b. Osteoarthritis (Deaths)
108-CD01b. Diarrhea - Acute (Deaths)	108-RM04b. Gout (Deaths)
108-CD02b. Diarrhea - Persistent (Deaths)	108-RM05b. Systemic Lupus Erythematous (Deaths)
108-CD03b. Genital Ulcers (Deaths)	108-RM06b. Polyarthritis unspecified (Deaths)
108-CD04b. Septicemia (Deaths)	108-RM07b. Monoarthritis unspecified (Deaths)
108-CD05b. Peritonitis (Deaths)	108-RM08b. Myalgia (Deaths)
108-CD06b. Pneumonia (Deaths)	108-RM09b. Others (please specify) (Deaths)
108-CD07b. No Pneumonia - Cough and cold (Deaths)	108-TX01b. Organophosphate poisoning (Deaths)
108-CD08b. Pyrexia of unknown origin (PUO) (Deaths)	108-TX02b. Drug overdose (Deaths)
108-CD09b. TB (Deaths)	108-TX03b. Rat Poisoning (Deaths)
108-CD10b. Leprosy (Deaths)	108-TX04b. Snake poison (Deaths)
108-CD11b. Osteomyelitis (Deaths)	108-TX05b. Poison of unknown etiology (Deaths)
108-CD12b. Urinary Tract Infections (UTI) (Deaths)	108a-AR01b. Supra Ventricular Tarchycardia (SVT) (Deaths)
108-CD13b. Tetanus (over 28 days age) (Deaths)	108a-AR02b. Atrial Fibrillation (Deaths)
108-CD14b. Sleeping sickness (Deaths)	108a-AR03b. Atrial Flutter (Deaths)
108-CI03. No. of deaths IPD	108a-AR04b. Ventricular Tarchycardia (Deaths)
108-CI03. Total Deaths Reported	108a-AR05b. Ventricular Fibrillation (VF) (Deaths)
108-CR01b. Asthma (Deaths)	108a-AR06b. Junctional Rhythms (Deaths)
108-CR02b. Chronic Obstructive Pulmonary Diseases (COPD) (Deaths)	108a-AR07b. Junctional accelerated rhythm dysfunction (JAR) (Deaths)
108-CR03b. Pulmonary Fibrosis (Deaths)	108a-AR08b. Sick Sinus Syndrome (Deaths)
108-CR04b. Post TB Lung disease (Deaths)	108a-AR09b. Conjunction Blocks (Deaths)
108-CV01b. Hypertension (newly diagnosed cases) (Deaths)	108a-AR10b. Sinatrial block (Deaths)
108-CV02b. Hypertension (old cases) (Deaths)	108a-AR11b. Atrial Ventricular Blocks (Deaths)
108-CV03b. Stroke/Cardiovascular Accident(CVA) (Deaths)	108a-AR12b. Bundle branch blocks (Deaths)
108-CV04b. Heart failure (Deaths)	108a-AR13b. Heart Blocks (1st,2nd, 3rd ) (Deaths)
108-CV05b. Ischemic Heart Diseases (Deaths)	108a-AR14b. Node dysfunction (Deaths)
108-CV06b. Rheumatic Heart Diseases (Deaths)	108a-CC01b. Diabetes Mellitus (Deaths)
108-CV07b. Chronic Heart Diseases (Deaths)	108a-CC02b. Chronic Kidney Disease (Deaths)
108-CV08b. Other Cardiovascular Diseases (Deaths)	108a-CC03b. HIV (Deaths)
108-EC01b. Ophthalmic Neonatorum (Deaths)	108a-CC04b. Asthma (deaths)
108-EC02b. Cataracts (Deaths)	108a-CC05b. Sickle cell disease (Deaths)
108-EC03b. Refractive errors (Deaths)	108a-CC06b. Chronic liver disease (Deaths)
108-EC04b. Glaucoma (Deaths)	108a-CC07b. Others (Deaths)
108-EC05b. Trachoma (Deaths)	108a-CD01b. Atrial Septal Defect (ASD) (Deaths)
108-EC06b. Tumours (Deaths)	108a-CD02b. Ventricular Septal Defect (VSD) (Deaths)
108-EC07b. Blindness (Deaths)	108a-CD03b. Tetralogy of Fallot (TOF) (Deaths)
108-EC08b. Diabetic Retinopathy (Deaths)	108a-CD04b. Patent Dactus Arteriosus (PDA) (Deaths)
108-EC09b. Other eye conditions (Deaths)	108a-CD05b. Truncus Arteriosus (Deaths)
108-EM01a.2. Diabetes mellitus (newly diagnosed cases) (Deaths)	108a-CD06b. Coarctation of Aorta (Deaths)
108-EM01b.2. Diabetes mellitus (re-attendances) (Deaths)	108a-CI03. No. of deaths (C)
108-EM02b. Thyroid disease (Deaths)	108a-CM01b. Dilated Cardiomyopathy (Deaths)
108-EM03b. Other Endocrine and metabolic disorders (Deaths)	108a-CM02b. Hypertrophic Cardiomyopathy (Deaths)
108-EN01b. Otitis media (Deaths)	108a-CM03b. Restrictive Cardiomyopathy (Deaths)
108-EN02b. Hearing loss (Deaths)	108a-EC01b. Endocarditis (Deaths)
108-EN03b. Other ENT conditions (Deaths)	108a-EC02b. Endomyocardial Fibrosis (Deaths)
108-EP01a.2. Malaria Total (Deaths)	108a-GC01b. Colorectal cancer (Deaths)
108-EP01b.2. Malaria Confirmed (Microscopic &RDT) (Deaths)	108a-GC02b. Stomach cancer (Deaths)
108-EP02b. Acute Flaccid Paralysis (Deaths)	108a-GI03b. Oesophageal cancer (Deaths)
108-EP03b. Animal Bites (suspected rabies) (Deaths)	108a-GI04b. Small intestine cancer (Deaths)
108-EP04b. Cholera (Deaths)	108a-GI05b. Large intestine cancer (Deaths)
108-EP05b. Dysentery (Deaths)	108a-GI06b. Gastrointestinal stromal tumour (Deaths)
108-EP06b. Guinea Worm (Deaths)	108a-GI07b. Anal cancer (Deaths)
108-EP07b. Measles (Deaths)	108a-GI08b. Carcinoid tumour (Deaths)
108-EP08b. Neonatal tetanus (Deaths)	108a-GI09b. Duodenal cancer (Deaths)
108-EP09b. Plague (Deaths)	108a-GI10b. Juvenile polyposis syndrome (Deaths)
108-EP10b. Yellow Fever (Deaths)	108a-GI11b. Intraductal papillary mucinous neoplasm (Deaths)
108-GC01b. Cancer of the cervix(newly diagnosed cases) (Deaths)	108a-GI12b. Hepatoblastoma (Deaths)
108-GC02b. Cancer of the cervix (re-attendance) (Deaths)	108a-GI13b. Pseudomyxoma peritonei (Deaths)
108-GC03b. Cancer of the breast (Deaths)	108a-GI14b. Digestive system neoplasm (Deaths)
108-GC04b. Tubal Ovarian mass/cancer (Deaths)	108a-GI15b. Linitisplastica (Deaths)
108-GC05b. Pelvic Inflammatory Disease (PID) (Deaths)	108a-GI16b. Gallbladder & biliary trach Cancer (Deaths)
108-GC06b. Uterine Fibroids (Deaths)	108a-GI17b. Pancreatic Cancer (Deaths)
108-GC07b. Other Gynaecological conditions (Deaths)	108a-GI18b. SEMINOMA(Deaths)
108-GD01b. Abdominal Pain (Deaths)	108a-GI19B. Hepatocellular carcinoma (HCC) (Deaths)
108-GD02b. Intususception (Deaths)	108a-GI20b. Liver Cancer (Deaths)
108-GD03b. Peptic Ulcer Disease (Deaths)	108a-GU01b. Kidney Cancer (Deaths)
108-GD04b. Gastro-esophageal reflux disease (GERD) (Deaths)	108a-GU02b. Prostate Cancer (Deaths)
108-GD05b. Chronic Liver Disease (Deaths)	108a-GY01b. Cervical Cancer (Deaths)
108-GD06b. Acute Hepatitis (Deaths)	108a-GY02b. Gestational Trophoblastic Disease (GTD) (Deaths)
108-GD07b. Irritable Bowel Syndrome (Deaths)	108a-GY03b. Primary Peritoneal Cancer (Deaths)
108-GD08b. Liver Cirrhosis (Deaths)	108a-GY04b. Ovarian Cancer (Deaths)
108-GD09b. Varices (oesophageal or gastric) (Deaths)	108a-GY05b. Uterine/Endometrial Cancer (Deaths)
108-GD10b. Colorectal and anal disorder (Deaths)	108a-GY06b. Vaginal Cancer (Deaths)
108-GD11b. Multiple Myeloma (Deaths)	108a-GY07b. Vulvar Cancer (Deaths)
108-GD12b. Aplastic Anaemia (Deaths)	108a-HC01b. Leukemia (Deaths)
108-GD13b. Others(Specify) (Deaths)	108a-HC02b. Acute Myeloid leukemia (Deaths)
108-GD14b. Others (specify) (Deaths)	108a-HC03b. Acute promyelocytic Leukemia(APL) (Deaths)
108-HF01b. Ebola (Deaths)	108a-HC04b. Acute lymphoid leukemia (Deaths)
108-HF02b. Marburg (Deaths)	108a-HC05b. Chronic Myeloid leukemia (Deaths)
108-HF03b. Crimean-Cong Haemorrhagic Fever (Deaths)	108a-HC06b. Chronic lymphocytic Leukemia(Deaths)
108-HF04b. Other Viral Hemorrhagic Fevers (Specify) (Deaths)	108a-HC07b. Lymphomas (Deaths)
108-HF05b. Severe Acute Respiratory Infection (SARI) (Deaths)	108a-HC08b. Non-Hodgkin’s Lymphoma (Deaths)
108-HF06b1. Adverse Events Following Immunization (AEFI)- Serious (Deaths)	108a-HC09b. Hodgkin‚Äôs Lymphoma (Deaths)
108-HF06b2. Adverse Events Following Immunization (AEFI)- Non serious (Deaths)	108a-HC10b. Primary CNS lymphoma (Deaths)
108-HF07b. Typhoid Fever (Deaths)	108a-HC11b. Burkitt‚Äôs Lymphoma (Deaths)
108-HF08b. Presumptive MDR TB Cases (Deaths)	108a-HC12b. MALT lymphomac (Deaths)
108-HF09b. Other Emerging infectious Diseases, specify (Deaths)	108a-HC13b. Multiple Myeloma (Deaths)
108-HP01b. Liver cirrhosis related to HBV (Deaths)	108a-HC14b. Gastric lymphoma (Deaths)
108-HP02b. Liver failure related to HCV (Deaths)	108a-HD01b. Hypertension (Deaths)
108-HP03b. Hepatocellular Carcinoma related to HBV (Deaths)	108a-HD02b. Diastolic Dysfunction (Deaths)
108-HP04b. Hepatocellular Carcinoma related to HCV (Deaths)	108a-HD03b. Left Ventricular Hypertrophy (Deaths)
108-HP05b. Acute Hepatitis (Deaths)	108a-HD04b. Hypertensive Heart Disease (Deaths)
108-IN01a.2. Motor Vehicle (Deaths)	108a-HD05b. Hypertensive Cardiomyopathy (Deaths)
108-IN01b.2. Motor Cycle (Deaths)	108a-HF01b. Systolic Dysfunction (Deaths)
108-IN01c.2. Bicycles (Deaths)	108a-HF02b. Diastolic Dysfunction (Deaths)
108-IN01d.2. Others (Deaths)	108a-HF03b. Congestive Heart Failure (Deaths)
108-IN02b. Jaw injuries (Deaths)	108a-HN01b. Nasal pharyngeal carcinoma (Deaths)
108-IN03b. Injuries - (Trauma due to other causes) (Deaths)	108a-HN02b. Oral Pharyngeal carcinomas (Deaths)
108-IN04a.2. Animal bites - Domestic (Deaths)	108a-HN03b. Other head and neck cancers (Deaths)
108-IN04b.2. Animal bites - Wild (Deaths)	108a-IH01b. Angina Pectoris (Deaths)
108-IN04c.2. Animal bites - Insects (Deaths)	108a-IH02b. Unstable Angina (Deaths)
108-IN05b. Snakes bites (Deaths)	108a-IH03b. Chronic Angina (Deaths)
108-LD01b. Hernias (Deaths)	108a-IH04a1. STEMI (Deaths)
108-LD02b. Diseases of the appendix (Deaths)	108a-IH04b1. NSTEMI (Deaths)
108-LD03b. Diseases of the skin (Deaths)	108a-IH05b. Coronary Embolism (Deaths)
108-LD04b. Muscular skeletal and connective tissue diseases (Deaths)	108a-MD01. Myocarditis (Deaths)
108-LD05b. Genital urinary system diseases (non- infective) (Deaths)	108a-MF01b. Neurofibro sarcoma (Deaths)
108-LD06b. Congenital malformations and chromosome abnormalities (Deaths)	108a-MF02b. Rhabdomyosarcoma (Deaths)
108-LD07b. Complications of medical and surgical care (Deaths)	108a-MF03b. Synovial sarcoma (Deaths)
108-LD08b. Benign neoplasm-s (all types) (Deaths)	108a-NB05b. Gallbladder Cancer (Deaths)
108-LD09b. Coetaneous ulcersv (Deaths)	108a-NB11b. Penile Cancer (Deaths)
108-MC01b. Abortions due to Gender Based Violence (GBV) (Deaths)	108a-OC01b. Astrocytoma (Deaths)
108-MC02b. Abortions due to other causes (Deaths)	108a-OC02b. Ependymoma (Deaths)
108-MC03b. Malaria in pregnancy (Deaths)	108a-OC03b. Malignant melanoma (Deaths)
108-MC04b. High blood pressure in pregnancy (Deaths)	108a-OC04b. Glioblastoma Multiformes(GBM) (Deaths)
108-MC05b. Obstructed labour (Deaths)	108a-OC05b. Other Brain and spinal cord tumours (Deaths)
108-MC06b. Haemorrhage related to pregnancy (APH or PPH) (Deaths)	108a-OC06b. Neuroblastoma (Deaths)
108-MC07b. Sepsis related to pregnancy (Deaths)	108a-OC07b. Testicular Carcinoma (Deaths)
108-MC08b. Obstetric Fistula (Deaths)	108a-OC08b. Wilms tumour (Deaths)
108-MC09b. No. of women diagnosed with fistula and treated by catheter (Deaths)	108a-OC09b. Bone cancer (including osteosarcoma and Ewing sarcoma) - Deaths
108-MC10b. No. of fistulas closed and dry at discharge (Deaths)	108a-OC10b. Retinoblastoma (Deaths)
108-MC12b. Other Complications of pregnancy (Deaths)	108a-OC11b. Renal Cancer (Deaths)
108-ME01b. Cerebro-vascular events (Deaths)	108a-OC12b. Breast Cancer (Deaths)
108-ME02b. Cardiac arrest (Deaths)	108a-OC13b. Penile Cancer (Deaths)
108-ME03b. Gastro-intestinal bleeding (Deaths)	108a-OC14b. Lung Cancer (Deaths)
108-ME04b. Respiratory distress (Deaths)	108a-PC08b. Gastric lymphoma (Deaths)
108-ME05b. Acute renal failure (Deaths)	108a-PC19b. Breast Cancer (Deaths)
108-ME06a.2. Acute sepsis Totals (Deaths)	108a-PC20b. Prostate Cancer (Deaths)
108-ME06b.2. Acute sepsis Given Oxygen (Deaths)	108a-PC21b. Penile Cancer (Deaths)
108-ME07b. All others (Deaths)	108a-PD01b. Pulmonary Embolism (Deaths)
108-ME08b. Total Diagnoses (Deaths)	108a-PD02b. Cor pulmonale (Deaths)
108-MG01b. Bacterial Meningitis (Deaths)	108a-PD03b. Pulmonary Hypertension (Deaths)
108-MG02b. Viral Meningitis (Deaths)	108a-PD04b. Pneumonia (Deaths)
108-MG03b. Cryptoccocal Meningitis (Deaths)	108a-PD05b. Chronic Obstructive Airway Disease (COPD) (Deaths)
108-MG04b. Other types of meningitis (Deaths)	108a-PD06b. Obstructive Sleep Apnea (OSA) (Deaths)
108-NC01b. Haematological Diseases (Deaths)	108a-PE01b. TB pericarditis (Deaths)
108-NC02b. Anaemia (Deaths)	108a-RH01b. Rheumatic Fever (Deaths)
108-NC03b. Sickle cell disease (Deaths)	108a-RH02b. Mitral Valve Disease (Deaths)
108-NC04b. Deep Vein Thrombosis (Deaths)	108a-RH03b. Aortic Valve Disease (Deaths)
108-NC05b. Lymphoma (Deaths)	108a-RH04b. Tricuspid Valve Disease (Deaths)
108-NC06b. Multiple Myeloma (Deaths)	108a-RH05b. Aortic valve stenosis (Deaths)
108-NC07b. Pain Requiring Palliative Care (Deaths)	108a-RH06b. Aortic valve regurgitation (Deaths)
108-NC08b. Liver cirrhisis related to alcohol (Deaths)	108a-RH07b. Mitral Stenosis (Deaths)
108-NC09b. Liver cirrhosis related to other causes (Deaths)	108a-RH08b. Mitral regurgitation (Deaths)
108-ND01b. Neonatal Sepsis 0-7days (Deaths)	108a-RH09b. Chronic Rheumatic Heart Disease (Deaths)
108-ND02b. Neonatal Sepsis 8-28days (Deaths)	108a-ST01b. Angiosarcoma (Deaths)
108-ND03b. Neonatal Pneumonia (Deaths)	108a-ST02b. Dermatofibrosarcoma (Deaths)
108-ND04b. Neonatal Meningitis (Deaths)	108a-ST03b. Epithelioid sarcoma (Deaths)
108-ND05b. Neonatal Jaundice (Deaths)	108a-ST04b. Ewing’s sarcoma (Deaths)
108-ND06b. Premature baby (as condition that requires mgt) (Deaths)	108a-ST05b. Fibrosarcoma (Deaths)
108-ND07b. Other Neonatal Conditions (Deaths)	108a-ST06b. Leiomyosarcoma (Deaths)
108-NR01b. Headache (Deaths)	108a-ST07b. Lipo sarcoma (Deaths)
108-NR02b. Epilepsy (Deaths)	108a-ST08b. Kaposis Sarcoma (Deaths)
108-NR03b. Cerebral Vascular disease (Deaths)	108a-ST09b. Osteo sarcoma (Deaths)
108-NR04b. Neuropathies (Deaths)	108a-VA01b. Phlebtis (Deaths)
108-NR05b. Parkinson-s disease (Deaths)	108a-VA02b. Thrombophlebitis (Deaths)
108-NR06b. Other movement disorders (Deaths)	108a-VA03b. Deep Vein Thrombosis (Deaths)
108-NR07b. Spinal Cord disorders (Deaths)	108a-VA04b. Varicose Veins (Deaths)
108-NT01b. Leishmaniasis (Deaths)	108a-VA05b. Veneous Insufficiency (Deaths)
108-NT02b. Lymphatic Filariasis (hydrocele) (Deaths)	108a-VA06b. Aortic Aneurysm (Deaths)
108-NT03b. Lymphatic Filariasis (Lympoedema) (Deaths)	108a-VA07b. Aortic Dissection (Deaths)
108-NT04b. Urinary Schistosomiasis (Deaths)	108a-VA08b. Arteriosclerosis (Deaths)
108-NT05b. Intestinal Schistosomiasis (Deaths)	108a-VA09b. Stroke (Deaths)
108-NT06b. Onchocerciasis (Deaths)	108a-VA10b. Ischaemic (Deaths)
108-NT07b. Nodding Syndrome (Deaths)	108a-VA11b. Hemorrhaghic (Deaths)
108-OD01b. Dental Caries (Deaths)	108a-VA12b. Peripheral Artery Disease (Deaths)
108-OD02b. Gingivitis (Deaths)	108a-VD01b. Mitral Valve Diseases (Deaths)
108-OD03b. Jaw injuries (Deaths)	108a-VD02b. Aortic Valve Diseases (Deaths)
108-OD04b. Other oral diseases and conditions (Deaths)	108a-VD03b. Tricuspid valve diseases (Deaths)
	108a-VD04b. Pulmonary valve diseases (PVD) Regurgitation (Deaths)
