# Supplementary figures and images for: The journey of strengthening mortality surveillance in Uganda through multisectoral guideline development
Source: Research Square preprint supplement (doi:10.21203/rs.3.rs-7358829/v1), 2025-11-10

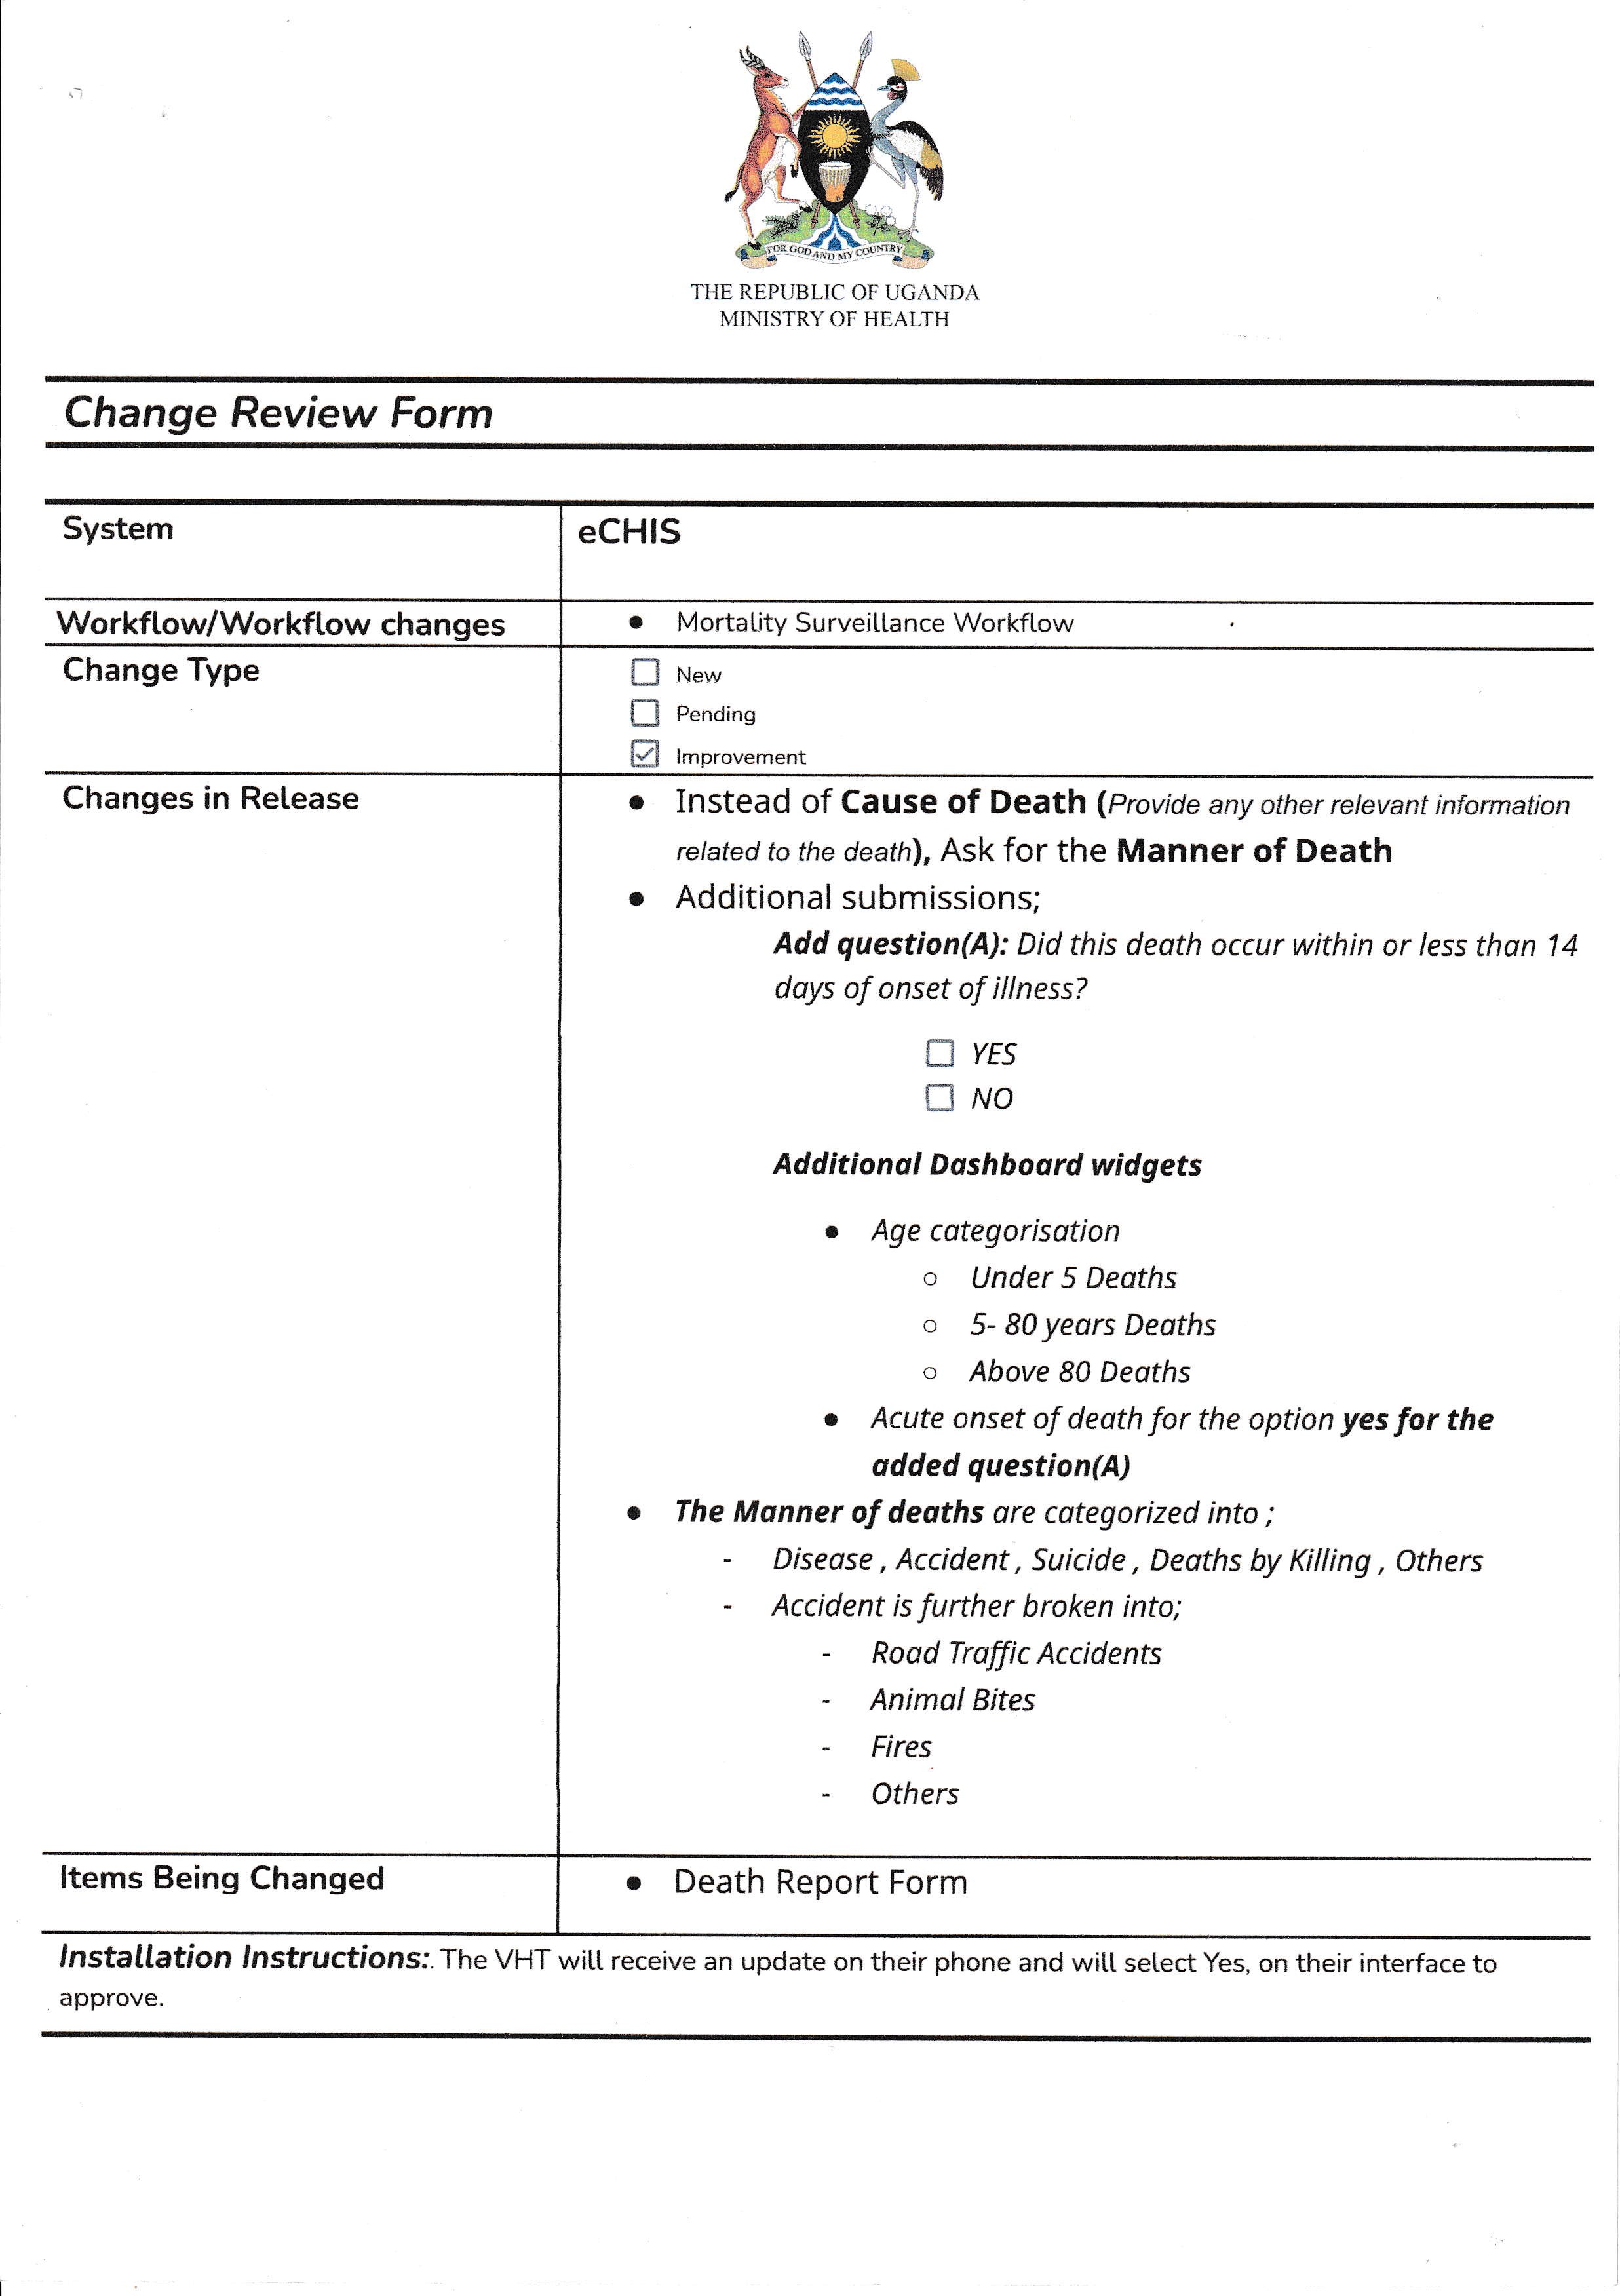


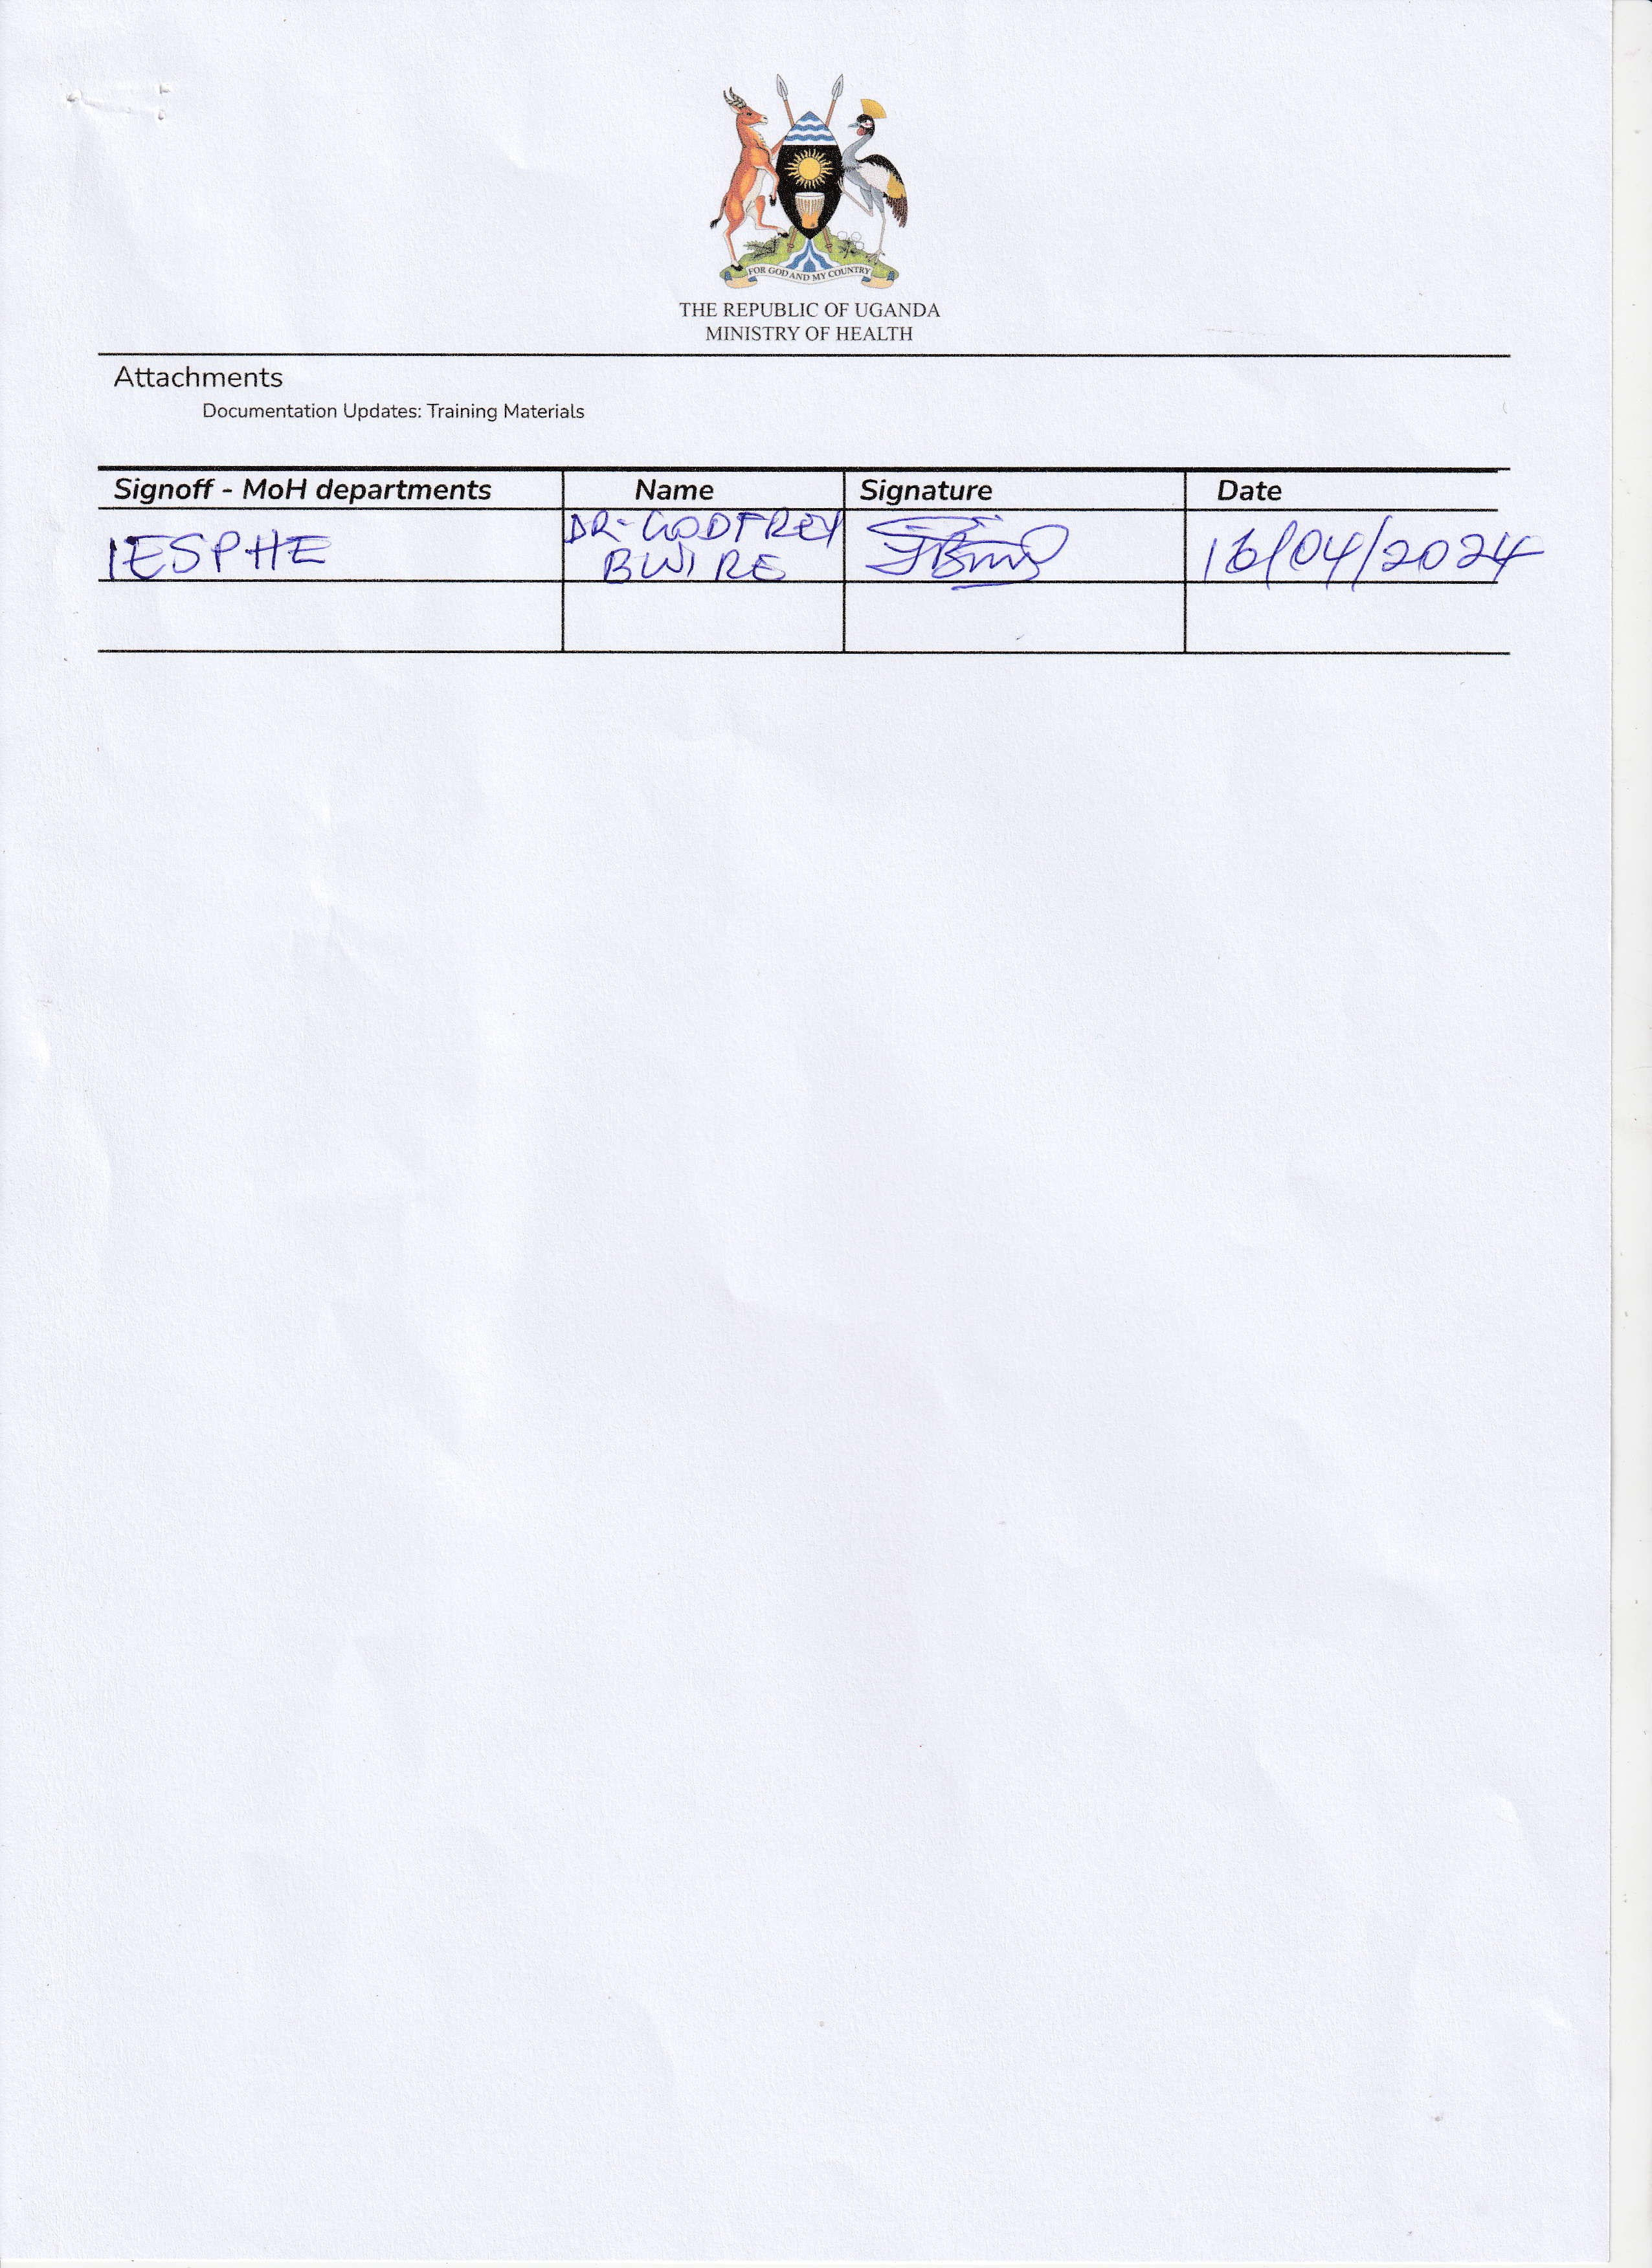

Supplement: Supplementary file 3 [file 976ffb2457e8625e84369d4e.docx]
